# Supplementary material for: Demonstration of Therapeutic Equivalence of Fluconazole Generic Products in the Neutropenic Mouse Model of Disseminated Candidiasis
Source: PLoS One. 2015 Nov 4;10(11):e0141872. doi: 10.1371/journal.pone.0141872 (PMC4633286; doi:10.1371/journal.pone.0141872)
Supplement: S10 File — Data file of Vitalis fluconazole (generic) for the pharmacokinetic analysis in S-ADAPT-TRAN. (CSV) [file pone.0141872.s011.csv]

OMIT	ID	Mouse	TIME	AMT	RATE	CMT	DVID	DV	MDV	EVID
.	1	A	0	0.4	0	3	0	.	1	1
.	1	A	1	.	.	1	1	14.093	0	0
.	2	B	0	0.4	0	3	0	.	1	1
.	2	B	1	.	.	1	1	15.428	0	0
.	3	C	0	0.4	0	3	0	.	1	1
.	3	C	1	.	.	1	1	14.399	0	0
.	4	D	0	0.4	0	3	0	.	1	1
.	4	D	4	.	.	1	1	8.937	0	0
.	5	E	0	0.4	0	3	0	.	1	1
.	5	E	4	.	.	1	1	8.386	0	0
.	6	F	0	0.4	0	3	0	.	1	1
.	6	F	4	.	.	1	1	8.244	0	0
.	7	G	0	0.4	0	3	0	.	1	1
.	7	G	8	.	.	1	1	5.338	0	0
.	8	H	0	0.4	0	3	0	.	1	1
.	8	H	8	.	.	1	1	4.933	0	0
.	9	I	0	0.4	0	3	0	.	1	1
.	9	I	8	.	.	1	1	5.038	0	0
.	10	J	0	0.4	0	3	0	.	1	1
.	10	J	12	.	.	1	1	1.932	0	0
.	11	K	0	0.4	0	3	0	.	1	1
.	11	K	12	.	.	1	1	1.835	0	0
.	12	L	0	0.4	0	3	0	.	1	1
.	12	L	12	.	.	1	1	1.308	0	0
.	13	M	0	0.4	0	3	0	.	1	1
.	13	M	24	.	.	1	1	0.366	0	0
.	14	N	0	0.4	0	3	0	.	1	1
.	14	N	24	.	.	1	1	0.478	0	0
.	15	O	0	0.4	0	3	0	.	1	1
.	15	O	24	.	.	1	1	0.291	0	0
.	16	P	0	0.1	0	3	0	.	1	1
.	16	P	1	.	.	1	1	4.002	0	0
.	17	Q	0	0.1	0	3	0	.	1	1
.	17	Q	1	.	.	1	1	3.005	0	0
.	18	R	0	0.1	0	3	0	.	1	1
.	18	R	1	.	.	1	1	2.486	0	0
.	19	S	0	0.1	0	3	0	.	1	1
.	19	S	4	.	.	1	1	2.184	0	0
.	20	T	0	0.1	0	3	0	.	1	1
.	20	T	4	.	.	1	1	3.001	0	0
.	21	U	0	0.1	0	3	0	.	1	1
.	21	U	4	.	.	1	1	2.006	0	0
.	22	V	0	0.1	0	3	0	.	1	1
.	22	V	8	.	.	1	1	1.483	0	0
.	23	W	0	0.1	0	3	0	.	1	1
.	23	W	8	.	.	1	1	1.481	0	0
.	24	X	0	0.1	0	3	0	.	1	1
.	24	X	8	.	.	1	1	1.255	0	0
.	25	Y	0	0.1	0	3	0	.	1	1
.	25	Y	12	.	.	1	1	0.754	0	0
.	26	Z	0	0.1	0	3	0	.	1	1
.	26	Z	12	.	.	1	1	0.835	0	0
.	27	AA	0	0.1	0	3	0	.	1	1
.	27	AA	12	.	.	1	1	0.862	0	0
.	28	BB	0	0.1	0	3	0	.	1	1
L	28	BB	24	.	.	1	1	0.01	0	0
.	29	CC	0	0.1	0	3	0	.	1	1
L	29	CC	24	.	.	1	1	0.01	0	0
.	30	DD	0	0.1	0	3	0	.	1	1
L	30	DD	24	.	.	1	1	0.01	0	0
.	31	EE	0	0.025	0	3	0	.	1	1
.	31	EE	1	.	.	1	1	0.921	0	0
.	32	FF	0	0.025	0	3	0	.	1	1
.	32	FF	1	.	.	1	1	0.842	0	0
.	33	GG	0	0.025	0	3	0	.	1	1
.	33	GG	1	.	.	1	1	0.792	0	0
.	34	HH	0	0.025	0	3	0	.	1	1
.	34	HH	4	.	.	1	1	0.284	0	0
.	35	II	0	0.025	0	3	0	.	1	1
.	35	II	4	.	.	1	1	0.385	0	0
.	36	JJ	0	0.025	0	3	0	.	1	1
.	36	JJ	4	.	.	1	1	0.258	0	0
.	37	KK	0	0.025	0	3	0	.	1	1
.	37	KK	8	.	.	1	1	0.205	0	0
.	38	LL	0	0.025	0	3	0	.	1	1
.	38	LL	8	.	.	1	1	0.109	0	0
.	39	MM	0	0.025	0	3	0	.	1	1
.	39	MM	8	.	.	1	1	0.095	0	0
.	40	NN	0	0.025	0	3	0	.	1	1
L	40	NN	12	.	.	1	1	0.01	0	0
.	41	OO	0	0.025	0	3	0	.	1	1
L	41	OO	12	.	.	1	1	0.01	0	0
.	42	PP	0	0.025	0	3	0	.	1	1
L	42	PP	12	.	.	1	1	0.01	0	0
